# Supplementary material for: A theoretical study on the proton affinity of sulfur ylides
Source: Royal Society of Chemistry journal article supplement (doi:10.1039/d2nj00948j), 2022-01-01
Supplement: d2nj00948j1.pdf [file d2nj00948j1.pdf]

## Supporting Information

### Theoretical Study on Proton Affinity of Sulfur Ylides

Yaxin Yang, Wenrui Zheng\*, Lufei Ren and Xiaofei Xu

College of Chemistry and Chemical Engineering, Shanghai University of Engineering Science, Shanghai 201620, China

Table S1 The calculated PA of 23 sulfur ylides by using 26 kinds of DFTs (kJ/mol)

| Entry | sulfur ylides | B3LYP   | B3P86   | M05-2X  | M06     | M06-2X  | M06-HF  | M06-L   | ωB97XD  |
|-------|---------------|---------|---------|---------|---------|---------|---------|---------|---------|
| 1     |               | 1118.48 | 1119.34 | 1126.16 | 1111.45 | 1116.67 | 1126.03 | 1120.06 | 1137.33 |
| 2     |               | 1120.75 | 1121.58 | 1128.00 | 1113.67 | 1118.74 | 1127.59 | 1123.12 | 1139.21 |
| 3     |               | 968.33  | 966.05  | 964.63  | 957.77  | 960.76  | 964.38  | 967.09  | 979.06  |
| 4     |               | 952.92  | 952.70  | 960.33  | 949.77  | 955.18  | 966.03  | 952.12  | 969.53  |
| 5     |               | 993.89  | 993.93  | 996.07  | 989.90  | 994.59  | 998.86  | 998.12  | 1011.18 |
| 6     |               | 971.34  | 971.57  | 974.37  | 968.39  | 973.13  | 978.07  | 975.34  | 988.83  |
| 7     |               | 999.73  | 1000.02 | 999.90  | 994.55  | 999.02  | 1000.86 | 1004.56 | 1016.21 |
| 8     |               | 1065.20 | 1064.69 | 1074.97 | 1058.58 | 1064.71 | 1078.55 | 1063.79 | 1082.59 |
| 9     |               | 936.90  | 934.32  | 933.91  | 927.73  | 929.98  | 934.98  | 935.30  | 947.91  |
| 10    |               | 1136.35 | 1138.60 | 1137.92 | 1123.47 | 1127.90 | 1133.22 | 1137.71 | 1149.76 |
| 11    |               | 968.33  | 966.05  | 964.11  | 957.77  | 960.76  | 964.38  | 967.09  | 979.06  |
| 12    |               | 808.38  | 803.19  | 800.80  | 798.59  | 799.62  | 799.06  | 806.01  | 816.54  |
| 13    |               | 943.08  | 942.65  | 939.26  | 937.63  | 937.34  | 935.40  | 947.03  | 956.18  |
| 14    |               | 993.89  | 993.93  | 996.07  | 989.90  | 994.59  | 998.86  | 998.12  | 1011.18 |
| 15    |               | 962.91  | 963.28  | 959.92  | 953.24  | 958.90  | 958.56  | 968.81  | 978.42  |
| 16    |               | 897.19  | 900.19  | 896.67  | 893.04  | 898.87  | 902.33  | 902.21  | 915.30  |

\* Corresponding author. Tel.: +86 21 67791216; fax: +86 21 67791220.  
 E-mail address: wrzheng@sues.edu.cn (W.R. Zheng).

|    |  |         |         |         |         |         |         |         |         |
|----|--|---------|---------|---------|---------|---------|---------|---------|---------|
| 17 |  | 1221.48 | 1128.30 | 1137.10 | 1122.91 | 1127.69 | 1139.07 | 1129.71 | 1148.77 |
| 18 |  | 868.54  | 865.26  | 861.92  | 861.04  | 862.50  | 863.58  | 867.68  | 880.16  |
| 19 |  | 913.46  | 910.62  | 906.37  | 906.46  | 905.80  | 905.28  | 913.11  | 924.18  |
| 20 |  | 1013.48 | 1014.90 | 1014.26 | 1006.78 | 1006.29 | 1013.06 | 1013.58 | 1026.49 |
| 21 |  | 1036.35 | 1037.48 | 1036.91 | 1030.16 | 1029.63 | 1034.52 | 1037.83 | 1049.45 |
| 22 |  | 957.17  | 958.09  | 956.52  | 952.43  | 952.86  | 953.41  | 959.67  | 971.66  |
| 23 |  | 962.91  | 963.28  | 959.92  | 953.24  | 958.90  | 958.56  | 968.81  | 978.42  |

| Entry | sulfur ylides | BP86-D3 | ωB97    | KMLYP   | MPW1P86 | BMK     | MPW3LYP | N12     | N12-SX  |
|-------|---------------|---------|---------|---------|---------|---------|---------|---------|---------|
| 1     |               | 1106.19 | 1136.89 | 1131.69 | 1116.65 | 1132.19 | 1115.59 | 1111.08 | 1125.05 |
| 2     |               | 1109.35 | 1137.98 | 1133.19 | 1118.67 | 1135.33 | 1117.69 | 1113.34 | 1127.42 |
| 3     |               | 958.19  | 977.25  | 963.64  | 962.73  | 975.49  | 965.05  | 960.74  | 966.77  |
| 4     |               | 939.71  | 972.73  | 960.04  | 951.17  | 969.34  | 950.28  | 941.38  | 953.52  |
| 5     |               | 985.88  | 1011.31 | 998.96  | 991.91  | 1007.02 | 991.16  | 986.27  | 996.88  |
| 6     |               | 961.54  | 990.83  | 977.87  | 969.72  | 985.81  | 968.42  | 962.49  | 974.57  |
| 7     |               | 990.80  | 1016.31 | 1004.48 | 997.59  | 1012.47 | 996.66  | 993.03  | 1003.39 |
| 8     |               | 1050.71 | 1083.55 | 1075.71 | 1062.16 | 1078.16 | 1062.56 | 1056.30 | 1069.03 |
| 9     |               | 926.64  | 946.44  | 931.13  | 930.96  | 945.50  | 933.50  | 928.29  | 934.10  |
| 10    |               | 1124.31 | 1146.99 | 1143.65 | 1132.93 | 1138.96 | 1132.78 | 1134.35 | 1144.97 |
| 11    |               | 958.19  | 977.25  | 963.64  | 962.73  | 975.49  | 965.05  | 960.74  | 966.77  |
| 12    |               | 804.87  | 812.76  | 790.08  | 800.14  | 812.42  | 805.64  | 799.59  | 798.98  |
| 13    |               | 936.76  | 953.54  | 940.08  | 939.55  | 954.98  | 939.94  | 937.00  | 941.77  |
| 14    |               | 985.88  | 1011.31 | 998.96  | 991.91  | 1007.02 | 991.16  | 986.27  | 996.88  |

|    |  |         |         |         |         |         |         |         |         |
|----|--|---------|---------|---------|---------|---------|---------|---------|---------|
| 15 |  | 960.22  | 979.70  | 957.93  | 960.40  | 963.09  | 959.62  | 956.15  | 962.19  |
| 16 |  | 893.92  | 919.26  | 900.05  | 898.62  | 912.34  | 894.68  | 894.31  | 899.94  |
| 17 |  | 1116.02 | 1148.27 | 1142.01 | 1126.11 | 1143.38 | 1124.94 | 1121.00 | 1134.56 |
| 18 |  | 859.58  | 879.62  | 861.42  | 862.56  | 875.90  | 865.48  | 859.23  | 864.55  |
| 19 |  | 899.20  | 924.36  | 910.21  | 907.70  | 919.09  | 910.12  | 904.41  | 911.30  |
| 20 |  | 1002.98 | 1024.62 | 1017.63 | 1011.55 | 1024.60 | 1010.57 | 1009.16 | 1016.57 |
| 21 |  | 1024.72 | 1047.56 | 1040.99 | 1033.99 | 1047.28 | 1033.20 | 1032.07 | 1040.12 |
| 22 |  | 949.13  | 969.54  | 959.21  | 955.40  | 970.21  | 954.07  | 950.14  | 957.23  |
| 23 |  | 960.22  | 979.70  | 957.93  | 960.40  | 963.09  | 959.62  | 956.15  | 962.19  |

| Entry | sulfur ylides | M11-L   | MN12-L  | SOGGA11 | SOGGA11-X | BP86    | B97D    | B97-D3  | B3LYP-D3 | CAM-B3LYP | TPSS    |
|-------|---------------|---------|---------|---------|-----------|---------|---------|---------|----------|-----------|---------|
| 1     |               | 1091.69 | 1098.29 | 1094.61 | 1132.33   | 1100.71 | 1123.07 | 1123.83 | 1123.06  | 1120.85   | 1118.17 |
| 2     |               | 1092.68 | 1100.44 | 1095.74 | 1134.14   | 1103.26 | 1127.09 | 1126.81 | 1125.91  | 1122.67   | 1121.07 |
| 3     |               | 946.45  | 943.87  | 956.43  | 975.73    | 956.36  | 974.43  | 975.80  | 969.67   | 964.93    | 972.98  |
| 4     |               | 932.95  | 933.90  | 939.94  | 965.18    | 937.68  | 952.37  | 1008.24 | 954.77   | 955.83    | 953.73  |
| 5     |               | 975.67  | 978.67  | 981.47  | 1005.06   | 979.90  | 1000.52 | 1001.58 | 998.90   | 994.46    | 997.06  |
| 6     |               | 955.73  | 957.23  | 959.04  | 984.15    | 956.33  | 976.36  | 977.50  | 975.69   | 972.74    | 973.29  |
| 7     |               | 985.15  | 984.35  | 989.46  | 1011.51   | 985.75  | 1006.31 | 1006.87 | 1004.09  | 999.89    | 1001.59 |
| 8     |               | 1035.20 | 1039.17 | 1050.39 | 1077.14   | 1047.11 | 1067.15 | 1067.53 | 1068.28  | 1068.24   | 1063.04 |
| 9     |               | 913.30  | 911.61  | 924.99  | 944.12    | 925.06  | 942.46  | 943.81  | 938.15   | 933.64    | 941.26  |
| 10    |               | 1105.58 | 1107.64 | 1120.51 | 1144.25   | 1122.03 | 1141.14 | 1141.43 | 1138.15  | 1135.72   | 1138.01 |
| 11    |               | 946.45  | 943.87  | 956.43  | 975.73    | 956.36  | 974.43  | 975.80  | 969.67   | 964.93    | 972.98  |

|    |  |         |         |         |         |         |         |         |         |         |         |
|----|--|---------|---------|---------|---------|---------|---------|---------|---------|---------|---------|
| 12 |  | 789.69  | 780.52  | 803.72  | 810.00  | 801.33  | 819.99  | 821.54  | 811.39  | 801.68  | 814.75  |
| 13 |  | 929.03  | 921.98  | 946.21  | 950.58  | 934.12  | 951.10  | 952.38  | 945.30  | 940.07  | 947.75  |
| 14 |  | 975.67  | 978.67  | 981.47  | 1005.06 | 979.90  | 1000.52 | 1001.58 | 998.90  | 994.46  | 997.06  |
| 15 |  | 947.42  | 939.83  | 965.52  | 973.10  | 955.06  | 978.00  | 977.32  | 967.37  | 960.10  | 971.70  |
| 16 |  | 886.03  | 878.41  | 902.48  | 908.92  | 890.60  | 902.70  | 907.36  | 900.21  | 899.13  | 903.01  |
| 17 |  | 1102.33 | 1110.64 | 1103.18 | 1142.71 | 1109.14 | 1133.71 | 1133.94 | 1133.52 | 1130.75 | 1127.91 |
| 18 |  | 848.49  | 844.21  | 866.15  | 874.67  | 857.17  | 875.54  | 876.21  | 870.74  | 865.62  | 871.64  |
| 19 |  | 893.05  | 890.42  | 905.58  | 920.39  | 899.90  | 914.77  | 915.73  | 913.00  | 911.91  | 915.97  |
| 20 |  | 995.31  | 991.30  | 1012.77 | 1020.70 | 1002.97 | 1015.22 | 1017.74 | 1013.44 | 1013.43 | 1018.24 |
| 21 |  | 1018.59 | 1015.45 | 1033.74 | 1043.78 | 1024.59 | 1037.78 | 1040.58 | 1036.38 | 1036.34 | 1040.70 |
| 22 |  | 945.38  | 937.31  | 960.47  | 966.79  | 946.99  | 963.05  | 964.70  | 959.08  | 955.80  | 960.70  |
| 23 |  | 947.42  | 939.83  | 965.54  | 973.10  | 954.97  | 978.00  | 977.32  | 967.37  | 960.10  | 971.70  |

Table S2 The energies of highest occupied molecular orbital ( $E_{\text{HOMO}}$ ) of sulfoxide ylides (ev).

| Entry | sulfoxide ylides | $E_{\text{HOMO}}$ (ev) |
|-------|------------------|------------------------|
| 1     |                  | -6.93                  |
| 2     |                  | -6.93                  |
| 3     |                  | -7.79                  |
| 4     |                  | -7.10                  |
| 5     |                  | -7.13                  |
| 6     |                  | -7.18                  |
| 7     |                  | -7.31                  |
| 8     |                  | -7.28                  |

|    |                                                                                     |       |
|----|-------------------------------------------------------------------------------------|-------|
| 9  | 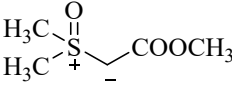  | -7.14 |
| 10 |    | -8.66 |
| 11 |    | -7.59 |
| 12 |    | -6.35 |
| 13 |    | -8.64 |
| 14 |   | -8.42 |
| 15 |    | -8.47 |
| 16 |  | -6.32 |
| 17 |  | -6.41 |
| 18 |  | -7.27 |
| 19 |  | -7.52 |
| 20 |  | -6.93 |
| 21 |  | -6.93 |

Table S3 The energies of highest occupied molecular orbital ( $E_{\text{HOMO}}$ ) of carbonyl ylides (ev).

| Entry | carbonyl ylides                                                                      | $E_{\text{HOMO}}$ (ev) |
|-------|--------------------------------------------------------------------------------------|------------------------|
| 1     | 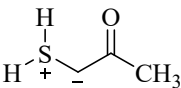  | -6.90                  |
| 2     |   | -6.90                  |
| 3     |   | -7.33                  |
| 4     |   | -6.97                  |
| 5     |   | -7.56                  |
| 6     |   | -7.37                  |
| 7     |  | -6.91                  |

|    |  |       |
|----|--|-------|
| 8  |  | -6.62 |
| 9  |  | -7.78 |
| 10 |  | -7.97 |
| 11 |  | -8.05 |
| 12 |  | -6.60 |
| 13 |  | -6.60 |
| 14 |  | -7.09 |
| 15 |  | -6.68 |

Table S4 The energies of highest occupied molecular orbital ( $E_{\text{HOMO}}$ ) of allyl ylides (ev).

| Entry | allyl ylides | $E_{\text{HOMO}}$ (ev) |
|-------|--------------|------------------------|
| 1     |              | -7.14                  |
| 2     |              | -6.48                  |
| 3     |              | -6.26                  |
| 4     |              | -6.79                  |
| 5     |              | -6.41                  |
| 6     |              | -6.56                  |
| 7     |              | -6.51                  |
| 8     |              | -6.90                  |
| 9     |              | -6.47                  |
| 10    |              | -7.56                  |
| 11    |              | -7.69                  |
| 12    |              | -8.11                  |

|    |                                                                                    |       |
|----|------------------------------------------------------------------------------------|-------|
| 13 | 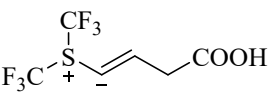 | -7.82 |
| 14 |   | -6.25 |
| 15 |   | -6.45 |
| 16 |   | -6.85 |
| 17 |  | -6.60 |

Table S5 The energies of highest occupied molecular orbital ( $E_{\text{HOMO}}$ ) of benzenyl ylides (ev).

| Entry | benzenyl ylides                                                                      | $E_{\text{HOMO}}$ (ev) |
|-------|--------------------------------------------------------------------------------------|------------------------|
| 1     | 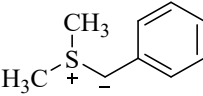   | -5.34                  |
| 2     |  | -5.91                  |
| 3     |  | -5.76                  |
| 4     |  | -5.81                  |
| 5     |  | -5.68                  |
| 6     |  | -6.09                  |
| 7     |  | -5.43                  |
| 8     |  | -5.12                  |
| 9     |  | -5.22                  |
| 10    |  | -5.08                  |
| 11    |  | -5.23                  |
| 12    |  | -4.91                  |
